# Supplementary material for: Volatile food signal activates DHAP shunt to elicit protective fmo-2 response in C. elegans
Source: Research Square preprint supplement (doi:10.21203/rs.3.rs-8020015/v1), 2025-11-14
Supplement: Supplementary file 1 [file 6947e0deeead17924b0df5cf.pdf]

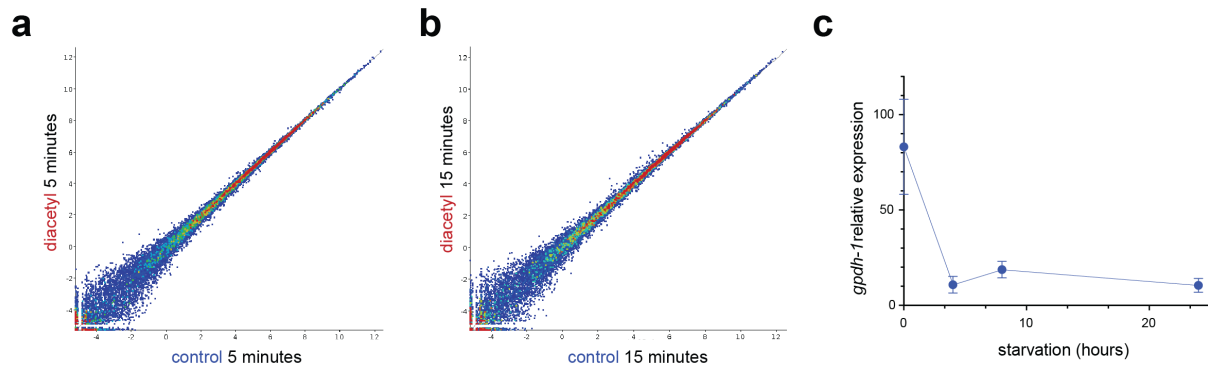

**Extended Data Fig 1.** **a**, Scatter plot comparing gene expression between control and diacetyl exposed worms after five minutes of diacetyl exposure. **b**, Scatter plot comparing gene expression between control and diacetyl exposed worms after fifteen minutes of diacetyl exposure. **c**, *gpdh-1* expression levels over twenty-four hours of food deprivation.

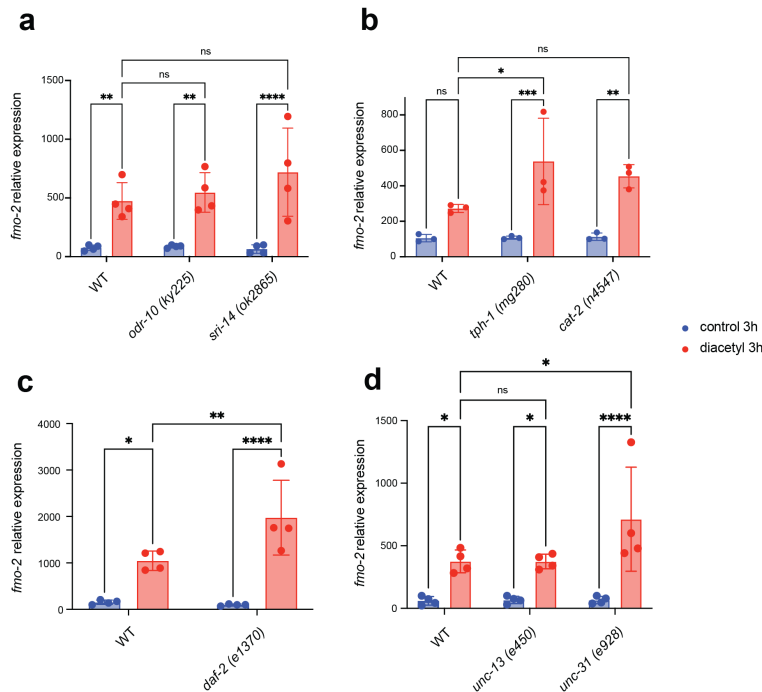

**Extended Data Fig 2.** **a**, *fmo-2* expression levels in WT, *odr-10* (*ky225*) and *sri-14* (*ok2865*) exposed to three hours of diacetyl in the absence of food. **b**, *fmo-2* expression levels in WT, *tph-1* (*mg280*) and *cat-2* (*n4547*) exposed to three hours of diacetyl in the absence of food. **c**, *fmo-2* expression levels in WT and *daf-2* (*e1370*) exposed to three hours of diacetyl in the absence of food. **d**, *fmo-2* expression levels in WT, *unc-13* (*e450*) and *unc-31* (*e928*) exposed to three hours of diacetyl in the absence of food. Data are presented as means; error bars represent  $\pm$  SD. *P* values were calculated by two-way ANOVA. \**P* < 0.05; \*\**P* < 0.01, \*\*\**P* < 0.001, \*\*\*\**P* < 0.0001.

**a**

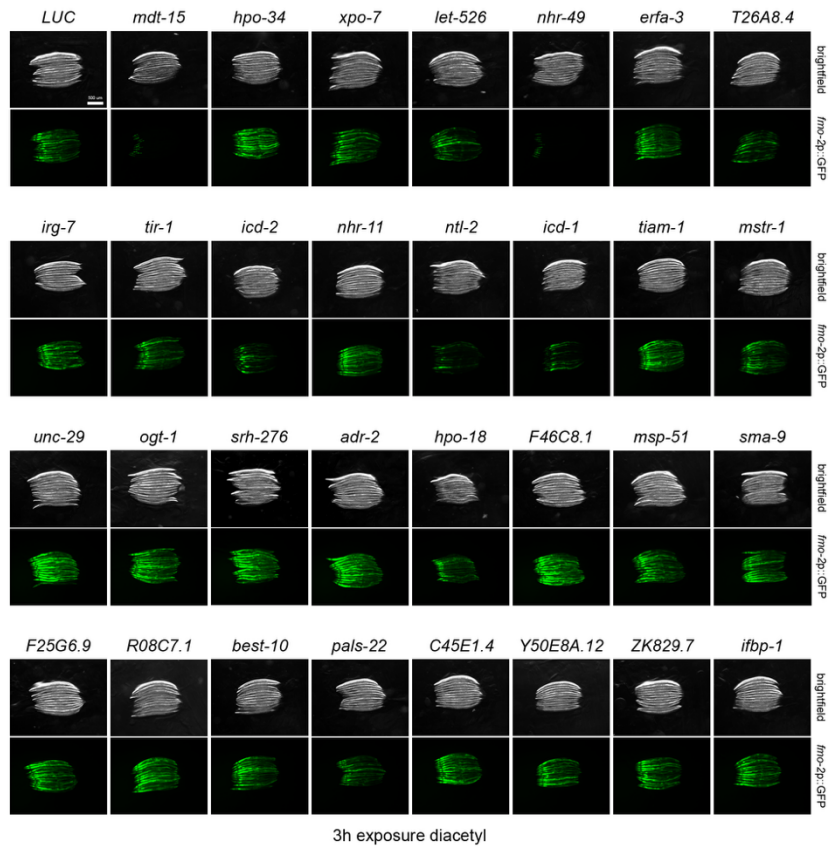

**Extended Data Fig 4. a.** Three hour diacetyl induction of *fmo-2* reporter in worms raised on 31 RNAi clones targeting suppressors of *far-3p::GFP* glucose induction<sup>9</sup> or non-targeting Luciferase (LUC, control).
